# Supplementary material for: Higher prevalence of psoriatic arthritis in the adult population in Spain? A population-based cross-sectional study
Source: PubMed Central journal article supplement (PMC7299392; doi:10.1371/journal.pone.0234556), 2020-06-17
Supplement: pone.0234556.s003.pdf [file pone.0234556.s003.pdf]

\* Encoding: UTF-8.

\*Weighting.

if (group=1 & sex2 = 1 & agegroup = 1 ) WEIGHT\_GroupCCAA = 2922.59016393443.  
if (group=1 & sex2 = 1 & agegroup = 2 ) WEIGHT\_GroupCCAA = 2940.56544502618.  
if (group=1 & sex2 = 1 & agegroup = 3 ) WEIGHT\_GroupCCAA = 4300.27857142857.  
if (group=1 & sex2 = 1 & agegroup = 4 ) WEIGHT\_GroupCCAA = 7583.45070422535.  
if (group=1 & sex2 = 1 & agegroup = 5 ) WEIGHT\_GroupCCAA = 6908.88888888889.  
if (group=1 & sex2 = 1 & agegroup = 6 ) WEIGHT\_GroupCCAA = 8400.02857142857.  
if (group=1 & sex2 = 1 & agegroup = 7 ) WEIGHT\_GroupCCAA = 5777.8.  
if (group=1 & sex2 = 2 & agegroup = 1 ) WEIGHT\_GroupCCAA = 6193.28571428571.  
if (group=1 & sex2 = 2 & agegroup = 2 ) WEIGHT\_GroupCCAA = 5544.  
if (group=1 & sex2 = 2 & agegroup = 3 ) WEIGHT\_GroupCCAA = 3833.47741935484.  
if (group=1 & sex2 = 2 & agegroup = 4 ) WEIGHT\_GroupCCAA = 3277.91764705882.  
if (group=1 & sex2 = 2 & agegroup = 5 ) WEIGHT\_GroupCCAA = 3929.85833333333.  
if (group=1 & sex2 = 2 & agegroup = 6 ) WEIGHT\_GroupCCAA = 3769.9175257732.  
if (group=1 & sex2 = 2 & agegroup = 7 ) WEIGHT\_GroupCCAA = 6337.29310344828.  
if (group=2 & sex2 = 1 & agegroup = 1 ) WEIGHT\_GroupCCAA = 7779.81818181818.  
if (group=2 & sex2 = 1 & agegroup = 2 ) WEIGHT\_GroupCCAA = 8533.57142857143.  
if (group=2 & sex2 = 1 & agegroup = 3 ) WEIGHT\_GroupCCAA = 10529.5049019608.  
if (group=2 & sex2 = 1 & agegroup = 4 ) WEIGHT\_GroupCCAA = 18437.6630434783.  
if (group=2 & sex2 = 1 & agegroup = 5 ) WEIGHT\_GroupCCAA = 14344.6395348837.  
if (group=2 & sex2 = 1 & agegroup = 6 ) WEIGHT\_GroupCCAA = 11664.1857142857.  
if (group=2 & sex2 = 1 & agegroup = 7 ) WEIGHT\_GroupCCAA = 11417.9512195122.  
if (group=2 & sex2 = 2 & agegroup = 1 ) WEIGHT\_GroupCCAA = 15988.4269662921.  
if (group=2 & sex2 = 2 & agegroup = 2 ) WEIGHT\_GroupCCAA = 12729.2151898734.  
if (group=2 & sex2 = 2 & agegroup = 3 ) WEIGHT\_GroupCCAA = 8062.078125.  
if (group=2 & sex2 = 2 & agegroup = 4 ) WEIGHT\_GroupCCAA = 6596.75954198473.  
if (group=2 & sex2 = 2 & agegroup = 5 ) WEIGHT\_GroupCCAA = 7388.28729281768.  
if (group=2 & sex2 = 2 & agegroup = 6 ) WEIGHT\_GroupCCAA = 7766.0859375.  
if (group=2 & sex2 = 2 & agegroup = 7 ) WEIGHT\_GroupCCAA = 12701.125.  
if (group=3 & sex2 = 1 & agegroup = 1 ) WEIGHT\_GroupCCAA = 6154.40677966102.  
if (group=3 & sex2 = 1 & agegroup = 2 ) WEIGHT\_GroupCCAA = 6069.1387283237.  
if (group=3 & sex2 = 1 & agegroup = 3 ) WEIGHT\_GroupCCAA = 10621.5533980583.  
if (group=3 & sex2 = 1 & agegroup = 4 ) WEIGHT\_GroupCCAA = 13637.7611940299.

```
if (group=3 & sex2 = 1 & agegroup = 5 ) WEIGHT_GroupCCAA = 6020.35779816514.  
if (group=3 & sex2 = 1 & agegroup = 6 ) WEIGHT_GroupCCAA = 10295.4545454545.  
if (group=3 & sex2 = 1 & agegroup = 7 ) WEIGHT_GroupCCAA = 7647.2380952381.  
if (group=3 & sex2 = 2 & agegroup = 1 ) WEIGHT_GroupCCAA = 14097.431372549.  
if (group=3 & sex2 = 2 & agegroup = 2 ) WEIGHT_GroupCCAA = 11307.4505494506.  
if (group=3 & sex2 = 2 & agegroup = 3 ) WEIGHT_GroupCCAA = 5496.1269035533.  
if (group=3 & sex2 = 2 & agegroup = 4 ) WEIGHT_GroupCCAA = 5379.06896551724.  
if (group=3 & sex2 = 2 & agegroup = 5 ) WEIGHT_GroupCCAA = 5762.64516129032.  
if (group=3 & sex2 = 2 & agegroup = 6 ) WEIGHT_GroupCCAA = 6385.09090909091.  
if (group=3 & sex2 = 2 & agegroup = 7 ) WEIGHT_GroupCCAA = 9159.5.
```

\*PsA prevalence.

```
COMPUTE Prev_PsA=0.
```

```
IF ((dxPsA1=1) OR (dxPsA2='TRUE')) Prev_PsA=1.
```

```
IF (state_PsA = 'Open' & missing = 1) Prev_PsA=$SYSMIS.
```

```
VALUE LABELS Prev_PsA 0 'No' 1 'Yes'.
```
